# Supplementary material for: Measuring macromolecular size distributions and interactions at high concentrations by sedimentation velocity
Source: PubMed Central journal article supplement (PMC6200768; doi:10.1038/s41467-018-06902-x), 2018-10-24
Supplement: 41467_2018_6902_MOESM1_ESM.pdf [file 41467_2018_6902_MOESM1_ESM.pdf]

Supporting Information for:

Measuring Macromolecular Size-  
Distributions and Interactions at High  
Concentrations by Sedimentation Velocity

Chaturvedi et al

Supplementary Figures 1-7

Supplementary Tables 1-3

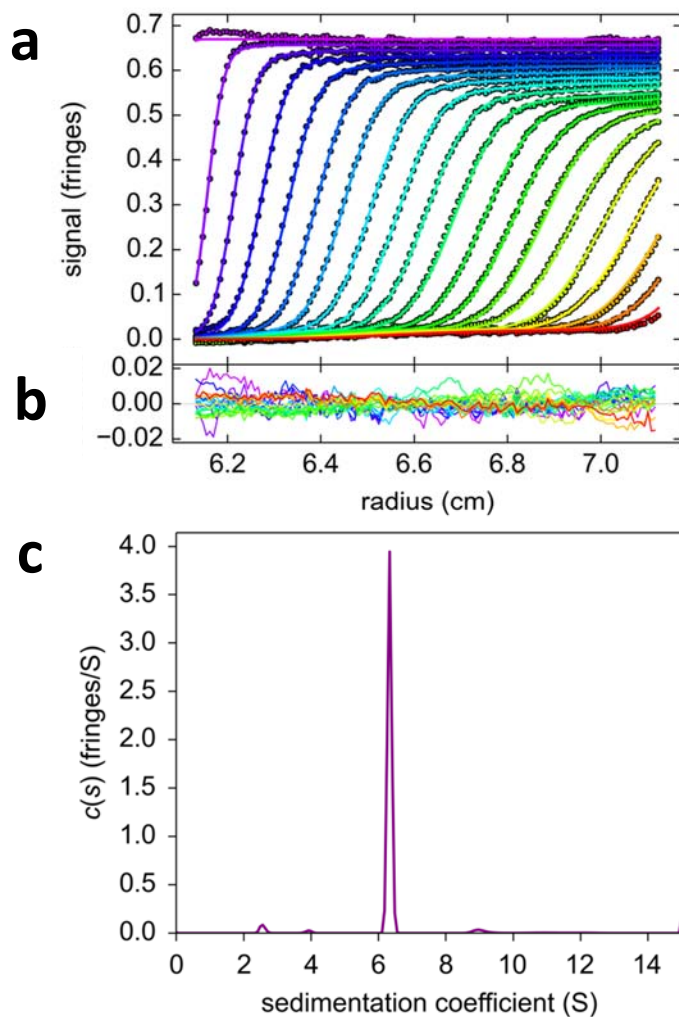

**Supplementary Figure 1.** Sedimentation velocity analysis of NISTmAb in dilute solution. (a) Interference data acquired during sedimentation of NISTmAb at 0.2 mg/ml at 45,000 rpm in a standard 12 mm centerpiece. For clarity, circles show only every 10<sup>th</sup> data point of every 3<sup>rd</sup> scan. The standard  $c(s)$  sedimentation coefficient distribution analysis results in a fit indicated by solid lines, using color temperature gradient to indicate the time-points of the boundary migrating from left to right. (b) Residuals of the fit, with a root-mean-square deviation (rmsd) of 0.0045 fringes. (c) Resulting sedimentation coefficient distribution, exhibiting a main peak at 6.33 S (uncorrected  $s$ -values;  $s_{20w} = 6.58$  S after calibration corrections) and a dimer peak at 9.04 S comprising 2.5% of the total material.

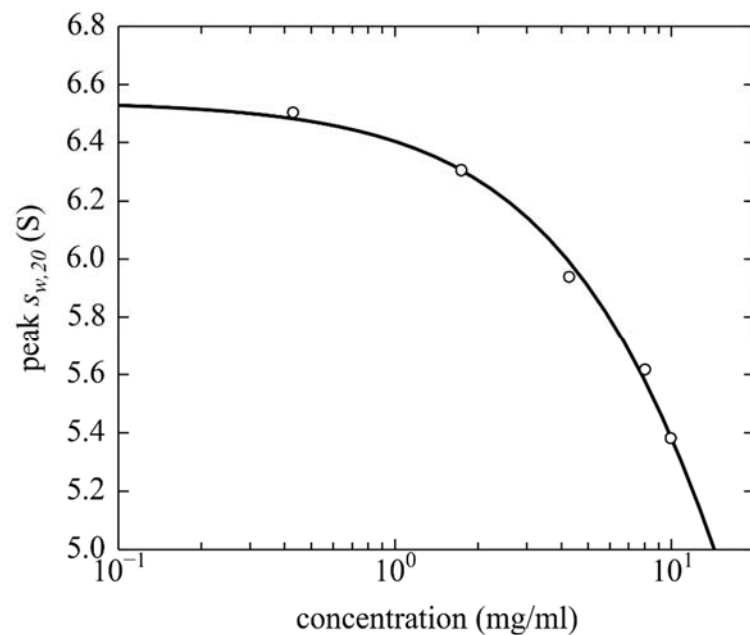

**Supplementary Figure 2.** Determination of the nonideality coefficient  $k_S$  of the NISTmAb from concentration series. Shown is the regression of monomer peak  $s$ -values from standard  $c(s)$  analysis observed as a function of concentration (see Eq. 3). Concentration values are loading concentrations corrected for the average radial dilution. The best-fit value is 21.5 ml/g (19.9 – 23.1 ml/g, 95% CI, determined by Monte-Carlo analysis).

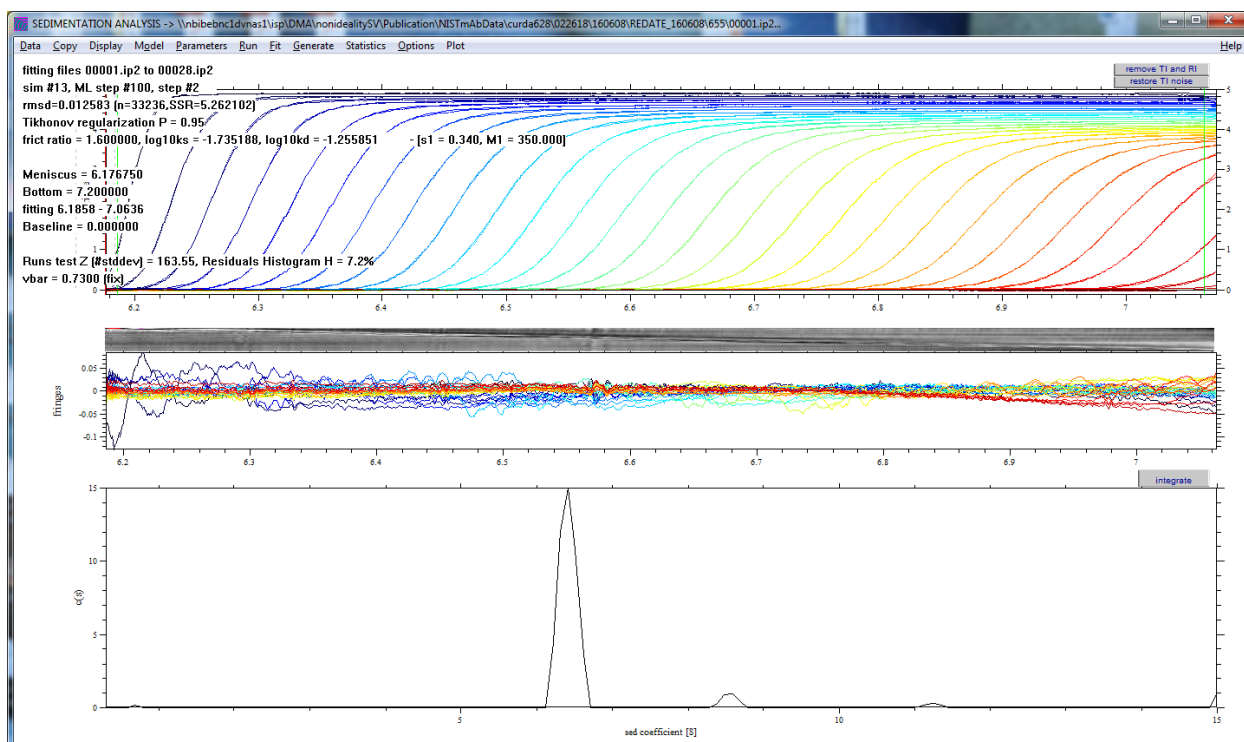

**Supplementary Figure 3.** Sedimentation analysis of NISTmAb at high concentration in short pathlength 3D printed centerpiece. Shown is a screenshot of the analysis of NISTmAb at 10 mg/ml sedimenting at 45,000 rpm in a custom 1.5 mm centerpiece. Data were fitted with the nonideal  $c_{NI}(s_0)$  model, resulting in an rmsd of 0.0125 fringes, and sedimentation coefficient distribution exhibiting the monomer peak at 6.66 S (after calibration correction), with 5.3% of material in a dimer peak, and best-fit estimates of  $k_S$  and  $k_D$  of 18.4 and 55.5 ml/g, respectively.

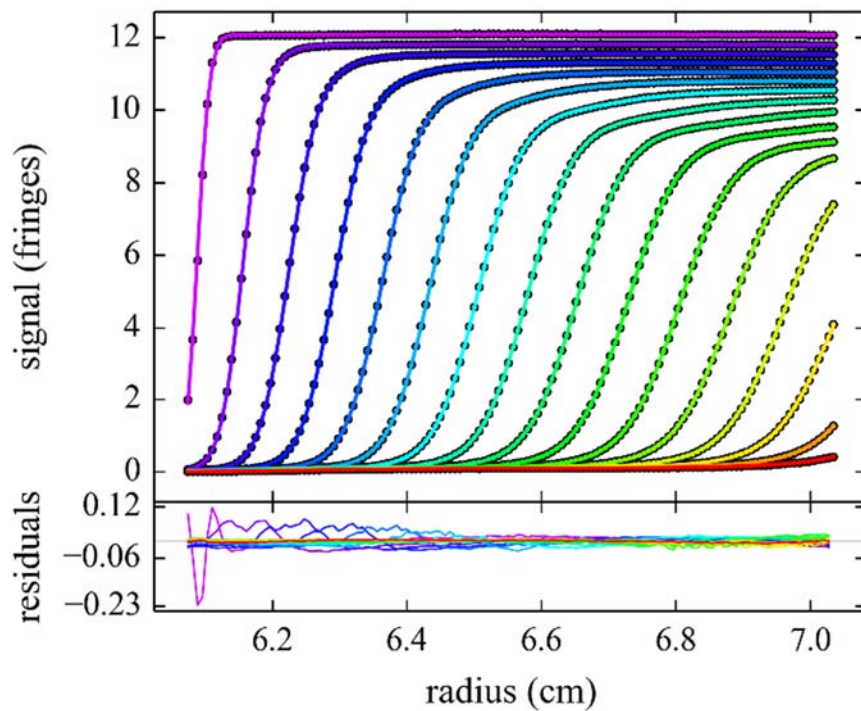

**Supplementary Figure 4.** Sedimentation analysis of apoferritin at high concentration. Concentration profiles of apoferritin at 12.6 mg/ml in PBS were acquired with the interference optics during sedimentation at 26,000 rpm in a 3 mm centerpiece (circles; only every 10<sup>th</sup> data point of every 3<sup>rd</sup> scan shown). The solid lines are the fit with the nonideal  $c_{NI}(s_0)$  model, resulting in an rmsd of 0.0129 fringes. The associated sedimentation coefficient distribution is shown in **Fig. 3**.

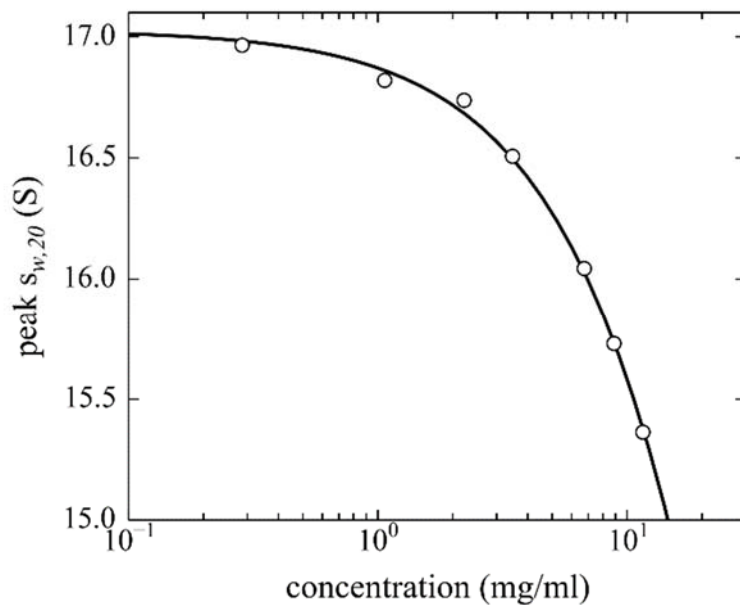

**Supplementary Figure 5.** Determination of the nonideality coefficient  $k_s$  of apoferritin in PBS through concentration series. Data points and solid line show the regression of monomer peak  $s$ -values in standard  $c(s)$  analysis observed as a function of concentration (see Eq. 3). Concentration values are loading concentrations corrected for the average radial dilution. The best-fit value is 9.3 ml/g (8.9 – 9.6 ml/g, 95% CI, determined by Monte-Carlo analysis).

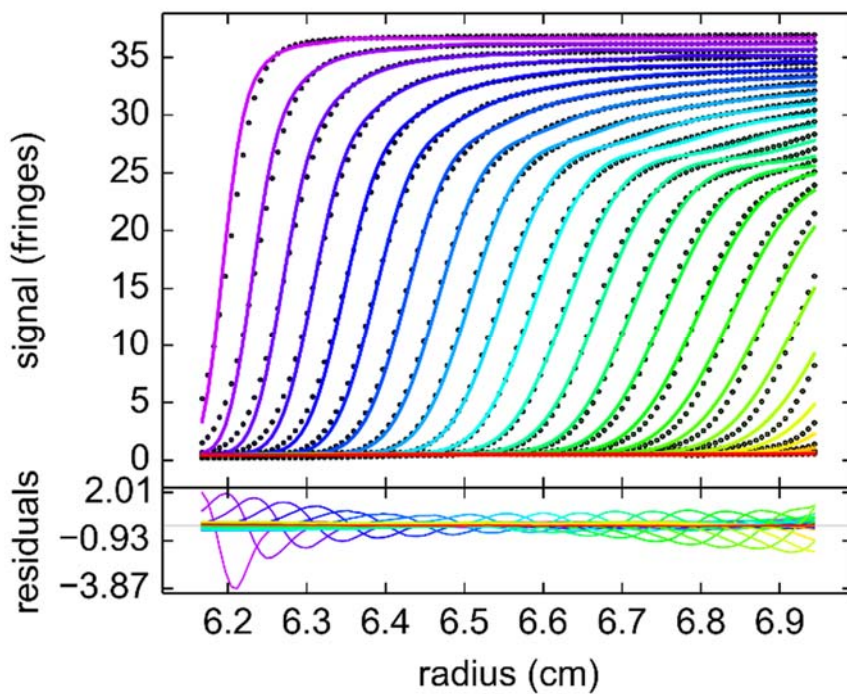

**Supplementary Figure 6.** Impostor model of BSA sedimentation data at 52 mg/ml with a standard  $c(s)$  model. Sedimentation data are the same as shown in **Fig. 5** (circles; only every 10<sup>th</sup> data point of every 3<sup>rd</sup> scan shown). The solid lines are the best-fit standard  $c(s)$  model for ideal solutions, the neglect of nonideality resulting in large systematic deviations.

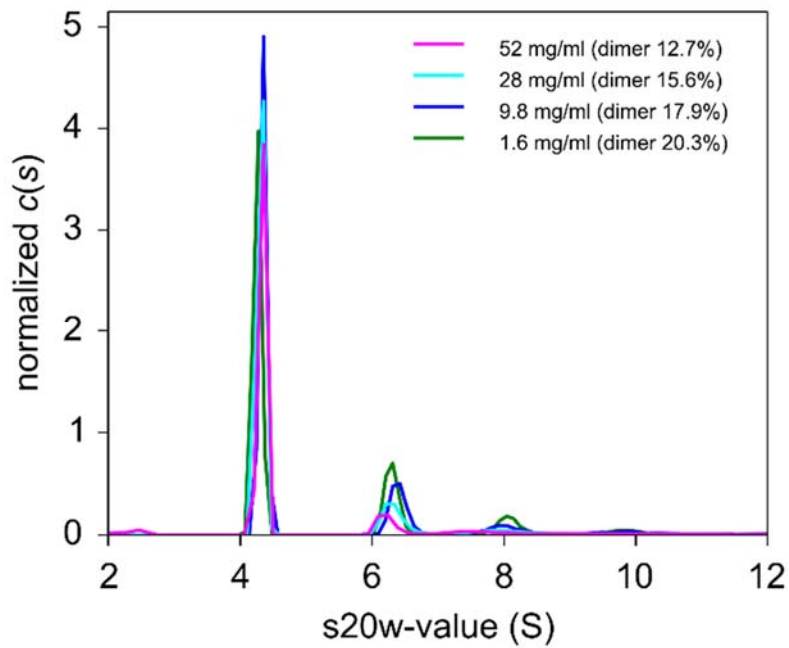

**Supplementary Figure 7.** Imposter  $c(s)$  distributions modeled to BSA at different concentrations. Shown are results from BSA at 52 mg/ml (magenta), 28 mg/ml (cyan), 9.8 mg/ml (blue), and 1.6 mg/ml (green). Data were acquired by interference optics using 3 mm centerpieces (52 mg/ml, 28 mg/ml, and 9.8 mg/ml) or 12 mm centerpieces (1.6 mg/ml), respectively. The normalized  $c(s)$  distributions exhibit apparent dimer fractions that decrease with increasing concentration, as a result of the Johnston-Ogston effect.



**Supplementary Table 1: Impact of Johnston-Ogston distortions at 5 mg/ml protein**

Nonideal sedimentation data were simulated for an antibody with properties similar to the NISTmAb, but with dimer fractions from 1 % to 20% at total concentration of 5 mg/ml. Simulations were carried out using a sedimentation model for two non-ideal discrete species. The resulting sedimentation patterns were analyzed with standard  $c(s)$  and  $c_{NI}(s_0)$ . The tables present the rmsd of these models, the peak  $s$ -values in the associated distributions, best-fit (or fixed) frictional ratios, and the apparent dimer fractions from integration of the dimer peaks of the distributions. In some conditions additional ghost peaks occur, as indicated in parenthesis.

| simulation 5mg/ml                             | parameters                            | standard $c(s)$ distribution |              | nonideal $c(s)$    |              |
|-----------------------------------------------|---------------------------------------|------------------------------|--------------|--------------------|--------------|
|                                               |                                       | s value                      | % abundance  | s value            | % abundance  |
| 99% monomer (6.33 S) +<br>1 % dimer (9.41 S)  | <b>peaks</b>                          | 5.82<br>8.92                 | 98.8<br>0.8  | 6.34<br>9.56       | 99.0<br>0.9  |
|                                               | <b>f/f<sub>0</sub></b><br><b>rmsd</b> | 2.5<br>0.027                 |              | 1.6 (fix)<br>0.010 |              |
| 98% monomer (6.33 S) +<br>2 % dimer (9.41 S)  | <b>peaks</b>                          | 5.82<br>8.78                 | 98.0<br>1.6  | 6.34<br>9.50       | 98.0<br>1.9  |
|                                               | <b>f/f<sub>0</sub></b><br><b>rmsd</b> | 2.5<br>0.026                 |              | 1.6 (fix)<br>0.010 |              |
| 98% monomer (6.33 S) +<br>5 % dimer (9.41 S)  | <b>peaks</b>                          | 5.84<br>8.70                 | 95.6<br>4.0  | 6.34<br>9.45       | 95.0<br>5.0  |
|                                               | <b>f/f<sub>0</sub></b><br><b>rmsd</b> | 2.5<br>0.025                 |              | 1.6 (fix)<br>0.010 |              |
| 90% monomer (6.33 S) +<br>10 % dimer (9.41 S) | <b>peaks</b>                          | 5.86<br>8.59                 | 91.2<br>7.6  | 6.30<br>9.38       | 90.0<br>10.0 |
|                                               | <b>f/f<sub>0</sub></b><br><b>rmsd</b> | 2.4<br>0.022                 |              | 1.6 (fix)<br>0.010 |              |
| 80% monomer (6.33 S) +<br>20 % dimer (9.41 S) | <b>peaks</b>                          | 5.90<br>8.60                 | 82.7<br>15.5 | 6.32<br>9.41       | 79.8<br>20.2 |
|                                               | <b>f/f<sub>0</sub></b><br><b>rmsd</b> | 2.3<br>0.019                 |              | 1.6 (fix)<br>0.010 |              |

**Supplementary Table 2: Impact of Johnston-Ogston distortions at 10 mg/ml protein**

Nonideal sedimentation data were simulated for an antibody with properties similar to the NISTmAb, but with dimer fractions from 1 % to 20% at total concentration of 10 mg/ml. Simulations were carried out using a sedimentation model for two non-ideal discrete species. The resulting sedimentation patterns were analyzed with standard  $c(s)$  and  $c_{NI}(s_0)$ . The tables present the rmsd of these models, the peak  $s$ -values in the associated distributions, best-fit (or fixed) frictional ratios, and the apparent dimer fractions from integration of the dimer peaks of the distributions. In some conditions additional ghost peaks occur, as indicated in parenthesis.

| simulation 10 mg/ml                           | parameters                            | standard $c(s)$ distribution |              | nonideal $c(s)$        |                     |
|-----------------------------------------------|---------------------------------------|------------------------------|--------------|------------------------|---------------------|
|                                               |                                       | s value                      | % abundance  | s value                | % abundance         |
| 99% monomer (6.33 S) +<br>1 % dimer (9.41 S)  | <b>peaks</b>                          | 5.31<br>8.09                 | 98.2<br>1.0  | 6.31<br>9.24           | 98.8<br>1.1         |
|                                               | <b>f/f<sub>0</sub></b><br><b>rmsd</b> | 4.3<br>0.098                 |              | 1.6 (fix)<br>0.012     |                     |
| 98% monomer (6.33 S) +<br>2 % dimer (9.41 S)  | <b>peaks</b>                          | 5.32<br>8.03                 | 97.5<br>1.7  | 6.29<br>(8.41)<br>9.36 | 97.5<br>0.5<br>1.7  |
|                                               | <b>f/f<sub>0</sub></b><br><b>rmsd</b> | 4.2<br>0.097                 |              | 1.6 (fix)<br>0.013     |                     |
| 95% monomer (6.33 S) +<br>5 % dimer (9.41 S)  | <b>peaks</b>                          | 5.34<br>7.67                 | 95.5<br>2.5  | 6.32<br>9.41           | 94.7<br>5.1         |
|                                               | <b>f/f<sub>0</sub></b><br><b>rmsd</b> | 4.2<br>0.092                 |              | 1.6 (fix)<br>0.011     |                     |
| 90% monomer (6.33 S) +<br>10 % dimer (9.41 S) | <b>peaks</b>                          | 5.38<br>7.78                 | 92.2<br>5.8  | 6.30<br>(7.78)<br>9.37 | 89.6<br>0.2<br>10.0 |
|                                               | <b>f/f<sub>0</sub></b><br><b>rmsd</b> | 3.9<br>0.085                 |              | 1.6 (fix)<br>0.013     |                     |
| 80% monomer (6.33 S) +<br>20 % dimer (9.41 S) | <b>peaks</b>                          | 5.45<br>7.82                 | 85.0<br>13.4 | 6.37<br>9.49           | 79.3<br>20.5        |
|                                               | <b>f/f<sub>0</sub></b><br><b>rmsd</b> | 3.6<br>0.070                 |              | 1.6 (fix)<br>0.011     |                     |

**Supplementary Table 1: Impact of Johnston-Ogston distortions at 20 mg/ml protein**

Nonideal sedimentation data were simulated for an antibody with properties similar to the NISTmAb, but with dimer fractions from 1 % to 20% at total concentration of 20 mg/ml. Simulations were carried out using a sedimentation model for two non-ideal discrete species. The resulting sedimentation patterns were analyzed with standard  $c(s)$  and  $c_{NI}(s_0)$ . The tables present the rmsd of these models, the peak  $s$ -values in the associated distributions, best-fit (or fixed) frictional ratios, and the apparent dimer fractions from integration of the dimer peaks of the distributions. In some conditions additional ghost peaks occur, as indicated in parenthesis.

| simulation 20 mg/ml                           | parameters                            | standard $c(s)$ distribution |             | nonideal $c(s)$        |                     |
|-----------------------------------------------|---------------------------------------|------------------------------|-------------|------------------------|---------------------|
|                                               |                                       | $s$ value                    | % abundance | $s$ value              | % abundance         |
| 99% monomer (6.33 S) +<br>1 % dimer (9.41 S)  | <b>peaks</b>                          | 4.29<br>6.81                 | 95.8<br>1.4 | 6.36<br>(7.78)<br>9.65 | 98.5<br>0.5<br>1.0  |
|                                               | <b>f/f<sub>0</sub></b><br><b>rmsd</b> | 10.9<br>0.397                |             | 1.6 (fix)<br>0.024     |                     |
| 98% monomer (6.33 S) +<br>2 % dimer (9.41 S)  | <b>peaks</b>                          | 4.30<br>6.77                 | 95.4<br>1.8 | 6.29<br>(7.91)<br>9.76 | 96.6<br>1.8<br>1.25 |
|                                               | <b>f/f<sub>0</sub></b><br><b>rmsd</b> | 10.8<br>0.394                |             | 1.6 (fix)<br>0.034     |                     |
| 98% monomer (6.33 S) +<br>5 % dimer (9.41 S)  | <b>peaks</b>                          | 4.34<br>6.62                 | 94.2<br>3.3 | 6.36<br>(8.15)<br>9.68 | 94.2<br>1.5<br>4.3  |
|                                               | <b>f/f<sub>0</sub></b><br><b>rmsd</b> | 10.4<br>0.380                |             | 1.6 (fix)<br>0.029     |                     |
| 90% monomer (6.33 S) +<br>10 % dimer (9.41 S) | <b>peaks</b>                          | 4.38<br>6.21                 | 92.8<br>3.4 | 6.28<br>9.32           | 89.6<br>10.2        |
|                                               | <b>f/f<sub>0</sub></b><br><b>rmsd</b> | 9.16<br>0.360                |             | 1.6 (fix)<br>0.034     |                     |
| 80% monomer (6.33 S) +<br>20 % dimer (9.41 S) | <b>peaks</b>                          | 4.49<br>6.19                 | 88.2<br>7.3 | 6.32<br>(7.99)<br>9.40 | 79.4<br>0.4<br>20.2 |
|                                               | <b>f/f<sub>0</sub></b><br><b>rmsd</b> | 8.29<br>0.318                |             | 1.6 (fix)<br>0.037     |                     |
